# Supplementary material for: The Influence of Vitamin D Status on Cognitive Ability in Patients with Bipolar Disorder and Healthy Controls
Source: MDPI journal article supplement (doi:10.3390/nu15194111), 2023-09-22
Supplement: s1 [file s1]

# The Influence of Vitamin D Status on Cognitive Ability in Patients with Bipolar Disorder and Healthy Controls

## S1. Hierarchical Regression Analyses in Healthy Controls

### S1.1. Attention

The results of the multiple hierarchical regression analysis indicated no significant association between the individuals' levels of 25(OH)D, 24,25(OH)2D3 or VMR and "attention". In all steps (Model 1:  $F(1, 91) = 13.41, p < 0.001$ ; Model 2:  $F(2, 90) = 14.06, p < 0.001$ ; Model 3:  $F(3, 89) = 9.65, p < 0.001$ ; Model 4:  $F(4, 88) = 7.17, p < 0.001$ ; Model 5:  $F(5, 87) = 5.70, p < 0.001$ ), age showed a significant effect on "attention", as well as premorbid IQ once it was taken in the model (see Table S1).

### S1.2. Memory

Age showed a significant effect on memory over all steps of the multiple hierarchical regression analysis. Premorbid IQ showed a significant effect on memory once it was taken in the model (Model 1:  $F(1, 91) = 21.76, p < 0.001$ ; Model 2:  $F(2, 90) = 15.39, p < 0.001$ ; Model 3:  $F(3, 89) = 10.55, p < 0.001$ ; Model 4:  $F(4, 88) = 7.82, p < 0.001$ ; Model 5:  $F(5, 87) = 6.28, p < 0.001$ ). No significant associations between 25(OH)D, 24,25(OH)2D3 or VMR and memory were found (see Table S1).

### S1.3. Executive Function

The results of the multiple hierarchical regression analysis indicated no significant association between 25(OH)D, 24,25(OH)2D3 or VMR and "executive function". In all steps (Model 1:  $F(1, 91) = 23.26, p < 0.001$ ; Model 2:  $F(2, 90) = 23.76, p < 0.001$ ; Model 3:  $F(3, 89) = 15.67, p < 0.001$ ; Model 4:  $F(4, 88) = 11.63, p < 0.001$ ; Model 5:  $F(5, 87) = 9.20, p < 0.001$ ), age showed a significant effect on "attention", as well as premorbid IQ once it was taken in the model (see Table S1).

**Table S1.** Association of age, premorbid IQ, 25(OH)D, 24,25(OH)2D3, VMR with "attention", "memory", and "executive function" in healthy controls.

|         |              | Attention |       |                  | Memory  |       |                  | Executive Function |       |                  |
|---------|--------------|-----------|-------|------------------|---------|-------|------------------|--------------------|-------|------------------|
|         |              | $\beta$   | $t$   | $p$              | $\beta$ | $t$   | $p$              | $\beta$            | $t$   | $p$              |
| Model 1 | Age          | -0.36     | -3.66 | <b>&lt;0.001</b> | -0.44   | -4.67 | <b>&lt;0.001</b> | -0.45              | -4.82 | <b>&lt;0.001</b> |
| Model 2 | Age          | -0.46     | -4.79 | <b>&lt;0.001</b> | -0.52   | -5.43 | <b>&lt;0.001</b> | -0.57              | -6.37 | <b>&lt;0.001</b> |
|         | Premorbid IQ | 0.35      | 3.60  | <b>&lt;0.001</b> | 0.26    | 2.73  | <b>0.008</b>     | 0.40               | 4.42  | <b>&lt;0.001</b> |
| Model 3 | Age          | -0.50     | -4.79 | <b>&lt;0.001</b> | -0.55   | -5.38 | <b>&lt;0.001</b> | -0.57              | -5.84 | <b>&lt;0.001</b> |
|         | Premorbid IQ | 0.35      | 3.66  | <b>&lt;0.001</b> | 0.27    | 2.80  | <b>0.006</b>     | 0.39               | 4.38  | <b>&lt;0.001</b> |
|         | 25(OH)D      | 0.09      | 0.94  | 0.350            | 0.09    | 0.95  | 0.347            | -0.01              | -0.09 | 0.932            |
| Model 4 | Age          | -0.50     | -4.77 | <b>&lt;0.001</b> | -0.55   | -5.35 | <b>&lt;0.001</b> | -0.57              | -5.81 | <b>&lt;0.001</b> |
|         | Premorbid IQ | 0.36      | 3.64  | <b>&lt;0.001</b> | 0.27    | 2.76  | <b>0.007</b>     | 0.40               | 4.34  | <b>&lt;0.001</b> |
|         | 25(OH)D      | 0.08      | 0.60  | 0.553            | 0.09    | 0.73  | 0.471            | -0.02              | -0.16 | 0.872            |
|         | 24,25(OH)2D3 | 0.03      | 0.22  | 0.828            | 0.01    | 0.02  | 0.988            | 0.02               | 0.15  | 0.879            |
| Model 5 | Age          | -0.50     | -4.73 | <b>&lt;0.001</b> | -0.56   | -5.35 | <b>&lt;0.001</b> | -0.57              | -5.77 | <b>&lt;0.001</b> |
|         | Premorbid IQ | 0.36      | 3.63  | <b>&lt;0.001</b> | 0.26    | 2.68  | <b>0.009</b>     | 0.40               | 4.30  | <b>&lt;0.001</b> |
|         | 25(OH)D      | 0.07      | 0.53  | 0.597            | 0.11    | 0.81  | 0.419            | -0.02              | -0.17 | 0.865            |
|         | 24,25(OH)2D3 | 0.05      | 0.35  | 0.728            | -0.05   | -0.31 | 0.758            | 0.02               | 0.17  | 0.868            |
|         | VMR          | -0.04     | -0.31 | 0.759            | 0.07    | 0.59  | 0.557            | -0.01              | -0.07 | 0.944            |

Note: Attention: Model 1:  $R^2 = 0.13, R^2_{\text{corr}} = 0.12$ , Model 2:  $R^2 = 0.24, R^2_{\text{corr}} = 0.22$ , Model 3:  $R^2 = 0.25, R^2_{\text{corr}} = 0.22$ , Model 4:  $R^2 = 0.25, R^2_{\text{corr}} = 0.21$ , Model 5:  $R^2 = 0.25, R^2_{\text{corr}} = 0.20$ ; Memory: Model 1:  $R^2 = 0.19, R^2_{\text{corr}} = 0.18$ , Model 2:  $R^2 = 0.26, R^2_{\text{corr}} = 0.24$ , Model 3:  $R^2 = 0.26, R^2_{\text{corr}} = 0.24$ , Model 4:  $R^2 = 0.26, R^2_{\text{corr}} = 0.23$ , Model 5:  $R^2 = 0.27, R^2_{\text{corr}} = 0.22$ ; Executive Function: Model 1:  $R^2 = 0.20, R^2_{\text{corr}} = 0.20$ , Model 2:  $R^2 = 0.35, R^2_{\text{corr}} = 0.33$ , Model 3:  $R^2 = 0.35, R^2_{\text{corr}} = 0.32$ , Model 4:  $R^2 = 0.35, R^2_{\text{corr}} = 0.32$ , Model 5:  $R^2 = 0.35, R^2_{\text{corr}} = 0.31$ . Bold printed  $p$ -values are significant.
